# Supplementary material for: ZnO–GaN heterostructured nanosheets for solar energy harvesting: computational studies based on hybrid density functional theory
Source: Royal Society of Chemistry journal article supplement (doi:10.1039/c2ta00706a), 2012-12-05
Supplement: c2ta00706a.pdf [file c2ta00706a.pdf]

Electronic Supplementary Information (ESI)

# **ZnO-GaN Heterostructured Nanosheets for Solar Energy Harvesting: Computational Studies Based on Hybrid Density Functional Theory**

Haijun Zhang,<sup>a,b</sup> Dihua Wu,<sup>a</sup> Qing Tang,<sup>a</sup> Lu Liu<sup>\*a</sup> and Zhen Zhou<sup>\*a</sup>

<sup>a</sup> *Key Laboratory of Advanced Energy Materials Chemistry (Ministry of Education), Tianjin Key Laboratory of Environmental Remediation and Pollution Control, Computational Centre for Molecular Science, and Institute of New Energy Material Chemistry, Nankai University, Tianjin 300071, P. R. China.*

<sup>b</sup> *School of Physics and Materials Science, Anhui University, Hefei 230039, P. R. China.*

\* Corresponding author. Email: [liul@nankai.edu.cn](mailto:liul@nankai.edu.cn) (LL) or [zhouzhen@nankai.edu.cn](mailto:zhouzhen@nankai.edu.cn) (ZZ)

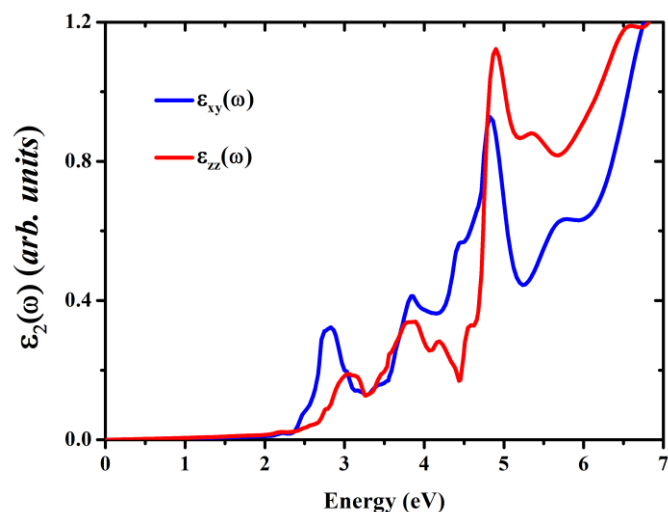

**Figure S1** Imaginary part  $\epsilon_2(\omega)$  of the H-(ZnO)<sub>4</sub>(GaN)<sub>4</sub> nanosheets.

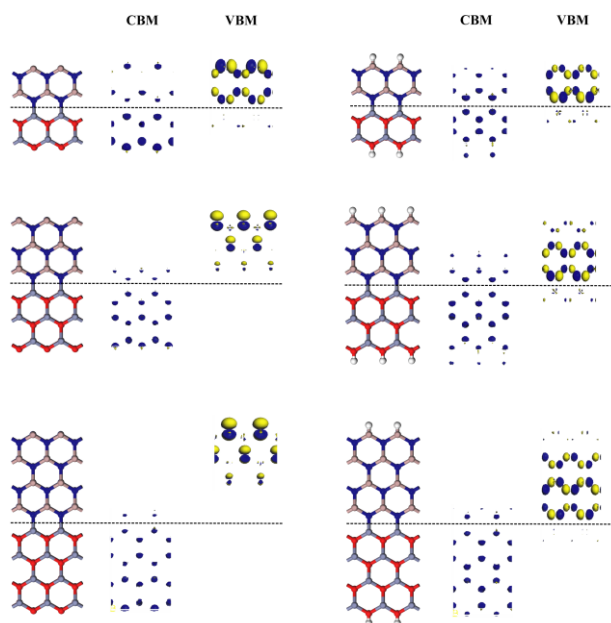

**Figure S2** Charge distribution of the band edges for the bare (left) and hydrogenated (right) (ZnO)<sub>m</sub>(GaN)<sub>n</sub> ( $m = n = 2, 3, 4$ ) nanosheets, respectively. Black dashed lines represent the interface between the ZnO and GaN region.

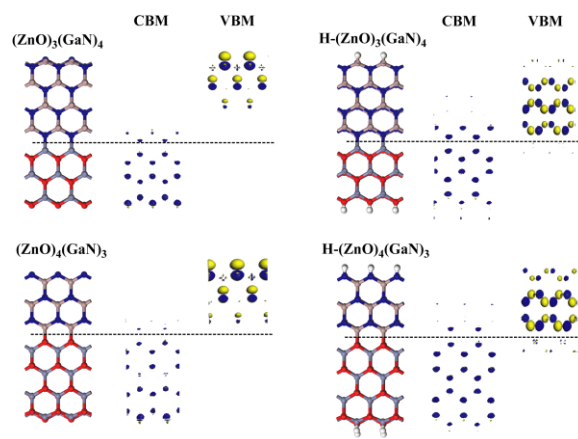

**Figure S3.** Charge distributions of the bare (left) and passivated (right) the  $(\text{ZnO})_3(\text{GaN})_4$  and  $(\text{ZnO})_4(\text{GaN})_3$  nanosheets. Black dashed lines represent the interface between the ZnO and GaN region.
